# Supplementary material for: USRCAT: real-time ultrafast shape recognition with pharmacophoric constraints
Source: Springer Nature journal article supplement (doi:10.1186/1758-2946-4-27), 2012-11-06

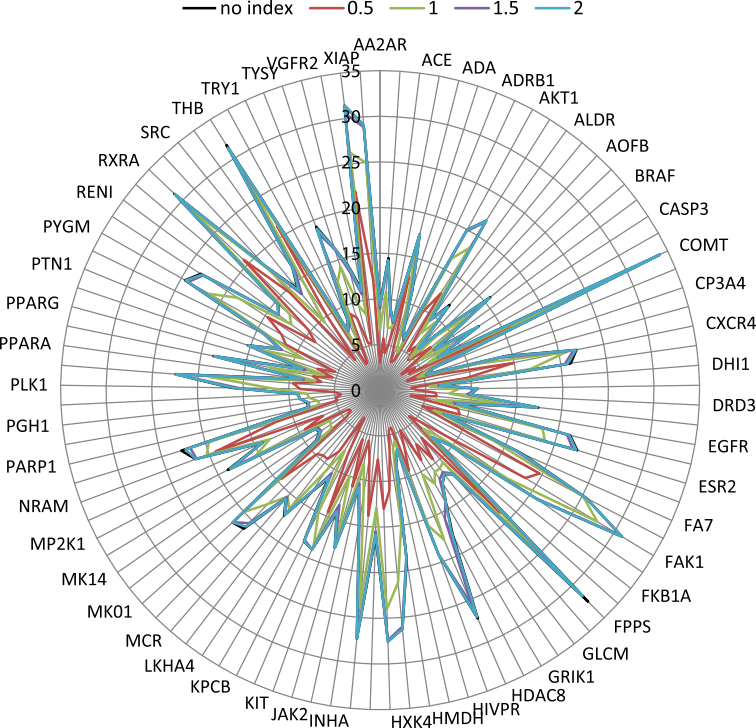

Supplement: 13321_2012_344_MOESM5_ESM.pdf [file 13321_2012_344_MOESM5_ESM.pdf]
